# Supplementary material
Source: MDPI journal article supplement (https://www.mdpi.com/2075-163X/12/8/1040)
Supplement: s1 [file s1]

Archive with 5 entries (5 files):
- Supplementary Figure.pdf
- Supplementary Table S1.xlsx
- Supplementary Table S2.xlsx
- Supplementary Table S3.xlsx
- Supplementary Table S4.xlsx
