# Supplementary material
Source: MDPI journal article supplement (https://www.mdpi.com/2075-163X/12/8/1040)
Supplement: s1 [file s1 › Supplementary Table S1.xlsx]

## Sheet: Table S1
Zircon age data for the Paleozoic-Traissic magmatic rocks in the southeastern CAOB
Order	Sample no.	Sample lation		Petrology	Age (Ma)	Method	References
1	08505-1	E110°10′55.1″	N41°59′50.6″	dacite	518 ± 3	LA-ICP-MS U-Pb	Zhang et al., 2014
2	12JL11-6	E126°19′	N43°41′	meta-diabase dyke	493 ± 2	LA-ICP-MS U-Pb	Pei et al., 2016
3	MT1–8	~E113°10′	~N42°20′	ophiolite：tonalite	490.1 ± 7.1	SHRIMP U-Pb	Jian et al., 2008
4	MS2–7	~E113°30′	~N43°30′	tonalite	481.3 ±2.2	SHRIMP U-Pb	Jian et al., 2008
5	MS2–1	~E113°30′	~N43°30′	gabbro	482.5 ± 1.7	SHRIMP U-Pb	Jian et al., 2008
6	MS2–5	~E113°30′	~N43°30′	quartz diorite	479.7 ± 1.8	SHRIMP U-Pb	Jian et al., 2008
7	MS2–4	~E113°30′	~N43°30′	tonalite	471.3 ± 2.4	SHRIMP U-Pb	Jian et al., 2008
8	-	E107°58′	N42°02′	Ophiolite：basalt	475.8 ± 1.6	LA-ICP-MS U-Pb	Zhang et al., 2015
9	MT1–6	~E113°10′	~N42°20′	ophiolite：metagabbro	479.6 ± 2.4	SHRIMP U-Pb	Jian et al., 2008
10	08504-1	E110°09′50.3″	N42°00′00.8″	andesite	474 ± 5	LA-ICP-MS U-Pb	Zhang et al., 2014
11	MT1–4	~E113°10′	~N42°20′	rondhjemite	471.6 ±1.7	SHRIMP U-Pb	Jian et al., 2008
12	08500-1	E110°07′04.6″	N41°59′12.8″	tonalite	473 ± 2	LA-ICP-MS U-Pb	Zhang et al., 2014
13	08502-1	E110°07′12.8″	N41°59′52.5″	tonalite	470 ± 3	LA-ICP-MS U-Pb	Zhang et al., 2014
14	MS3–5	~E113°30′	~N43°30′	tonalite	463.6 ±2.7	SHRIMP U-Pb	Jian et al., 2008
15	13JL2-1	E126°22′	N43°52′	pyroxene andesite	467 ± 1	LA-ICP-MS U-Pb	Pei et al., 2016
16	09226-1	E110°27′32.7″	N41°52′26.6″	metamorphic sandstone	ca. 464	LA-ICP-MS U-Pb	Zhang et al., 2014
17	09225-1	E110°26′59.2″	N41°52′29.0″	metamorphic sandstone	ca. 458	LA-ICP-MS U-Pb	Zhang et al., 2014
18	MT1–1	~E113°10′	~N42°20′	quartz diorite	453.7 ± 3.1	SHRIMP U-Pb	Jian et al., 2008
19	BYH02	~E110°30′	~N41°45′	diorite	451.5 ± 2.9	SHRIMP U-Pb	Jian et al., 2008
20	MT1–11	~E113°10′	~N42°20′	dacite	457.9 ± 2.6	SHRIMP U-Pb	Jian et al., 2008
21	08411-1	E112°33′06.7″	N42°12′58.8″	biotite quartz schist	ca. 458	LA-ICP-MS U-Pb	Zhang et al., 2014
22	12JL13-10	E126°22′	N43°52′	ultramaﬁc rock	459 ± 3	LA-ICP-MS U-Pb	Pei et al., 2016
23	07130-1	E110°12′23.3″	N41°53′47.4″	quartz diorite	453 ± 2	LA-ICP-MS U-Pb	Zhang et al., 2014
24	180824-32	E107°40′	N42°20′	quartz greywacke	458.9 ± 1.3	LA-ICP-MS U-Pb	Tian et al., 2019
25	09341-2	E124°59′40.1″	N43°27′36.7″	tonalite	446 ± 3	LA-ICP-MS U-Pb	Zhang et al., 2014
26	BYH03	~E110°30′	~N41°45′	quartz diorite	446.2 ± 2.2	SHRIMP U-Pb	Jian et al., 2008
27	08556-1	E109°54′05.4″	N41°59′32.3″	dacite	445 ± 4	LA-ICP-MS U-Pb	Zhang et al., 2014
28	08557-1	E109°54′11.8″	N41°59′53.8″	quartz diorite	445 ± 3	LA-ICP-MS U-Pb	Zhang et al., 2014
29	12JL4-1	E126°20′	N43°41′	tonalite	443 ± 5	LA-ICP-MS U-Pb	Pei et al., 2016
30	TM-09	E112°30′	N42°13′	metamorphic dacitic crystal tuffs	440.9 ± 1.8	LA-ICP-MS U-Pb	Zhang et al., 2017
31	TM-10	E112°30′	N42°13′	metamorphic dacitic crystal tuffs	440.9 ± 1.7	LA-ICP-MS U-Pb	Zhang et al., 2017
32	09224-3	E110°29′06.8″	N41°52′05.1″	metamorphic tuffa-ceous sandstone	ca. 440	LA-ICP-MS U-Pb	Zhang et al., 2014
33	BYH01	~E110°30′	~N41°45′	quartz diorite	440.3 ± 2.4	SHRIMP U-Pb	Jian et al., 2008
34	08413-1	E112°31′56.2″	N42°13′24.1″	tonalite	439 ± 5	LA-ICP-MS U-Pb	Zhang et al., 2014
35	08404-1	E112°43′15.1″	N42°16′49.6″	quartz diorite	439 ± 3	LA-ICP-MS U-Pb	Zhang et al., 2014
36	09344-1	E124°56′15.6″	N43°27′38.4″	quartz diorite	438 ± 4	LA-ICP-MS U-Pb	Zhang et al., 2014
37	21B19	E107°34′	N42°20′	quartz sandstone	437.9 ± 2.7	LA-ICP-MS U-Pb	Tian et al., 2019
38	08480-1	E110°36′35.4″	N41°48′40.1″	quartz diorite	436 ± 4	LA-ICP-MS U-Pb	Zhang et al., 2014
39	08432-1	E112°37′27.6″	N42°17′05.9″	diorite	436 ± 4	LA-ICP-MS U-Pb	Zhang et al., 2014
40	Y2001	E124°55′11.49″	N43°28′22.69″	quartz diorite	435.5 ± 2.6	LA-ICP-MS U-Pb	In this paper
41	08515-2	E110°34′11.5″	N41°50′16.1″	tonalite	433 ± 6	LA-ICP-MS U-Pb	Zhang et al., 2014
42	08429-1	E112°37′48.4″	N42°16′13.0″	tonalite	433 ± 3	LA-ICP-MS U-Pb	Zhang et al., 2014
43	08406-1	E112°43′19.9″	N42°17′34.4″	muscovite granite	432 ± 5	LA-ICP-MS U-Pb	Zhang et al., 2014
44	08409-1	E112°36′36.0″	N42°12′47.4″	quartz diorite	430 ± 3	LA-ICP-MS U-Pb	Zhang et al., 2014
45	08417-1	E112°33′31.7″	N42°14′16.3″	tonalite	430 ± 3	LA-ICP-MS U-Pb	Zhang et al., 2014
46	08487-1	E110°47′22.9″	N41°49′17.5″	alkali feldspar granite	429 ± 4	LA-ICP-MS U-Pb	Zhang et al., 2014
47	MS3–4	~E113°30′	~N43°30′	granite	427.3 ± 2.2	SHRIMP U-Pb	Jian et al., 2008
48	MT1–2	~E113°10′	~N42°20′	albitite	425.3 ±2.2	SHRIMP U-Pb	Jian et al., 2008
49	MS3–3	~E113°30′	~N43°30′	granite	422.8 ± 1.9	SHRIMP U-Pb	Jian et al., 2008
50	070813-7	E112°34′40.3″	N42°14′14.8″	quartz diorite	421 ± 2	LA-ICP-MS U-Pb	Zhang et al., 2014
51	13JL7-1	E126°23′	N43°51′	Tuffaceous sandy	420 ± 2	LA-ICP-MS U-Pb	Pei et al., 2016
52	LK27-1	E124°59′	N43°28′	granodiorite	419 ± 3	LA-ICP-MS U-Pb	Pei et al., 2016
53	LK33-1	E125°03′	N43°32′	rhyolite	419 ± 3	LA-ICP-MS U-Pb	Pei et al., 2016
54	13JL6-1	E126°22′	N43°51′	Tuffaceous sandy	417 ± 2	LA-ICP-MS U-Pb	Pei et al., 2016
55	DRAB01	~E110°30′	~N41°45′	tonalite	416.9 ± 1.7	SHRIMP U-Pb	Jian et al., 2008
56	12YT7-1	E124°59′	N43°28′	granodiorite	414 ± 5	LA-ICP-MS U-Pb	Pei et al., 2016
57	11LK02-1	E125°26′44″	N43°01′59″	rhyolitic tuffaceous rock	410 ± 2	LA-ICP-MS U-Pb	Pei et al., 2016
58	12JL12-1	E126°20′	N43°42′	tuffaceous rock	409 ± 8	LA-ICP-MS U-Pb	Pei et al., 2016
59	12JL5-1	E126°18′	N43°42′	rhyolitic breccia	404 ± 14	LA-ICP-MS U-Pb	Pei et al., 2016
60	14YT18-1	E125°27′50″	N43°02′15″	rhyolitic tuffaceous rock	403 ± 3	LA-ICP-MS U-Pb	Pei et al., 2016
61	12YT8-1	E125°06′	N43°28′	monzogranite	400 ± 2	LA-ICP-MS U-Pb	Pei et al., 2016
62	12SP7-7	E124°54′22″	N42°07′15″	monzogranite	396 ± 2	LA-ICP-MS U-Pb	Pei et al., 2016
63	Y2002	E125°02′33.59″	N43°30′24.94″	monzogranite	395.1 ± 2.1	LA-ICP-MS U-Pb	In this paper
64	2006MHS	E118°59′	N42°16′	A-type granite	387 ± 4	SHRIMP U-Pb	Shi et al., 2010
65	CK34	E123°27′14″	N42°02′17″	deformed granite	367.7 ± 7.7	LA-ICP-MS U-Pb	Gu et al., 2018
66	D301-TW1	E123°33′13″	N42°39′14″	high-Mg andesite	369.6 ± 2	LA-ICP-MS U-Pb	Shi et al., 2022
67	CK85	E124°52′19″	N42°38′49″	deformed diorite	359.4 ± 3.5	LA-ICP-MS U-Pb	Gu et al., 2018
68	EDG-TW3	E123°29′40″	N42°37′50″	gabbro	350.1 ± 1.8	LA-ICP-MS U-Pb	Shi et al., 2022
69	CK07	E123°50′22″	N42°20′00″	deformed granite	350.1 ± 3.3	LA-ICP-MS U-Pb	Gu et al., 2018
70	11LK19	E124°21′38″	N42°53′40″	basaltic andesite	342 ± 4	LA-ICP-MS U-Pb	Wang et al., 2015
71	11LK20	E124°21′39″	N42°53′37″	rhyolite	347 ± 4	LA-ICP-MS U-Pb	Wang et al., 2015
72	HFT-1	E111°53′54″	N41°22.64′	amphibolite	323.1 ± 3.4	LA-ICP-MS U-Pb	Liu et al., 2015
73	04ZH77	E118°32.3′	N40°27.1′	gabbro	306 ± 6	SHRIMP U-Pb	Zhao et al., 2007
74	04ZH85	E118°33.4′	N40°27.6′	gabbro	304 ± 3	SHRIMP U-Pb	Zhao et al., 2007
75	04ZH82	E118°34.9′	N40°28.3′	gabbro	303 ± 6	SHRIMP U-Pb	Zhao et al., 2007
76	DH006	E126°43′31″	N43°22′20″	dacite	302 ± 2	LA-ICP-MS U-Pb	Yu et al., 2014
77	04ZH83	E118°35.3′	N40°28.7′	pyroxenite	301 ± 2	SHRIMP U-Pb	Zhao et al., 2007
78	DH020	E126°44′36″	N43°21′54″	rhyolite	301 ± 2	LA-ICP-MS U-Pb	Yu et al., 2014
79	DH041	E126°44′58″	N43°21′16″	rhyolite	300 ± 2	LA-ICP-MS U-Pb	Yu et al., 2014
80	DH002	E126°43′17″	N43°22′25″	dacite	300 ± 2	LA-ICP-MS U-Pb	Yu et al., 2014
81	DH037	E126°44′54″	N43°21′21″	rhyolitic tuff	300 ± 2	LA-ICP-MS U-Pb	Yu et al., 2014
82	DH008	E126°43′51″	N43°22′16″	rhyolite	299 ± 2	LA-ICP-MS U-Pb	Yu et al., 2014
83	DH012	E126°44′05″	N43°22′10″	basalt	299 ± 2	LA-ICP-MS U-Pb	Yu et al., 2014
84	04ZH80	E118°34.1′	N40°27.9′	gabbro	298 ± 3	SHRIMP U-Pb	Zhao et al., 2007
85	FK51	E123°25′53″	N42°30′13″	granodiorite	284 ± 3	SHRIMP U-Pb	Zhang et al., 2005
86	YZ02-12–3	E128°56′12″	N42°28′46″	tonalite	285 ± 9	LA-ICP-MS U-Pb	Zhang et al., 2004
87	16YT1-7	E125°30′54″	N43°30′27″	andesite	280 ± 1	LA-ICP-MS U-Pb	Zhou et al., 2018
88	13YT10-1	E125°30′54″	N43°30′27″	basaltic andesite	279 ± 1	LA-ICP-MS U-Pb	Zhou et al., 2018
89	YB03-253	E129°54′06″	N43°34′49″	tonalite	277 ± 3	LA-ICP-MS U-Pb	Wu et al., 2011
90	16FK024	E123°18′22″	N43°33′46″	rhyolite	275.2 ± 1.9	LA-ICP-MS U-Pb	Jing et al., 2020a
91	17FK002	E123°15′23″	N43°31′29″	rhyolite	274.7 ± 1.7	LA-ICP-MS U-Pb	Jing et al., 2020a
92	16FK011	E123°16′02.8″	N42°31′48.1″	dacite	274.2 ± 2.1	LA-ICP-MS U-Pb	Jing et al., 2020a
93	06HCH–55	E130°55′25″	N42°58′08″	gabbro	273 ± 2	LA-ICP-MS U-Pb	Guo et al., 2016
94	DJP-1	E111°19′31″	N41°46.62′	granitoid	271.3 ± 1.5	LA-ICP-MS U-Pb	Liu et al., 2015
95	JN-57	E113°30′56″	N42°16′14″	granite	272.1 ± 1.2	LA-ICP-MS U-Pb	Jiang et al., 2016
96	LK12-1	E124°45′50″	N46°21′07″	garnet-bearing monzogranite	270 ± 1	LA-ICP-MS U-Pb	Cao et al., 2013
97	P27b6-1	E113°16′37″	N41°41′15″	granite	269.2 ± 1.6	LA-ICP-MS U-Pb	Jiang et al., 2016
98	P02b16-2	E113°29′12″	N41°48′36″	granite	267.2 ± 1.4	LA-ICP-MS U-Pb	Jiang et al., 2016
99	16FK016	E123°15′42″	N42°32′26″	andesite	267.3 ± 0.9	LA-ICP-MS U-Pb	Jing et al., 2020a
100	YB03-188	E129°24′29″	N43°30′29″	monzogranite	266 ± 3	LA-ICP-MS U-Pb	Wu et al., 2011
101	RZ39	E124°28′50″	N42°32′12″	gabbro diorite	266 ± 2	LA-ICP-MS U-Pb	Liu et al., 2019
102	FK53	E123°15′45″	N42°29′49″	granodiorite	265 ± 4	SHRIMP U-Pb	Zhang et al., 2005
103	16FK001	E123°16′16.1″	N42°29′36.8″	andesite	266.9 ± 3.5	LA-ICP-MS U-Pb	Jing et al., 2020a
104	JN-51	E113°30′10″	N42°20′05″	alkali feldspar granite	265.1 ± 1.5	LA-ICP-MS U-Pb	Jiang et al., 2016
105	Y2047	E125°16′58.39″	N42°58′43.4″	granite	264.4 ± 2.2	LA-ICP-MS U-Pb	In this paper
106	FW00-121	E125°51′48″	N42°58′11″	quartz syenite	264 ± 5	SHRIMP U-Pb	Wu et al., 2011
107	17FK006	E123°17′50.4″	N42°32′21.3″	gneissic monzogranite	261.2 ± 1.1	LA-ICP-MS U-Pb	Jing et al., 2020b
108	17FK007	E123°26′39.4″	N42°29′16.7″	gneissic syenogranite	260.1 ± 0.7	LA-ICP-MS U-Pb	Jing et al., 2020b
109	17FK015	E123°29′18.8″	N42°28′20.2″	gneissic monzogranite	260.9 ± 0.6	LA-ICP-MS U-Pb	Jing et al., 2020b
110	D14FK005–1	E123°16′02.8″	N42°31′48.1″	gneissic monzogranite	262.7 ± 1.7	LA-ICP-MS U-Pb	Jing et al., 2020b
111	JK17-1	E126°26′45″	N43°11′23″	amphibole gabbro	263 ± 1	LA-ICP-MS U-Pb	Wang et al., 2013
112	18FK002	E123°27′20.1″	N42°29′29.6″	gneissic syenogranite	262.2 ± 2.8	LA-ICP-MS U-Pb	Jing et al., 2020b
113	09HC–26	E129°55′30″	N43°40′11″	diorite	263 ± 3	LA-ICP-MS U-Pb	Guo et al., 2016
114	17FK14	E123°29′18.8″	N42°28′20.2″	diorite	262.1 ± 0.8	LA-ICP-MS U-Pb	Jing et al., 2020c
115	11LK24-1	E124°29′33″	N43°02′32″	Syenogranite	262 ± 2	LA-ICP-MS U-Pb	Cao et al., 2013
116	18FK017	E123°30′1.5″	N42°27′26.78″	gabbro diorite	261.3 ± 2.5	LA-ICP-MS U-Pb	Jing et al., 2020c
117	DM-1	E111°30′53″	N42°02.65′	muscovite granite	261.3 ± 3.8	LA-ICP-MS U-Pb	Liu et al., 2015
118	FK04-19	E123°29′	N42°22′	monzodiorite	261 ± 2	SHRIMP U-Pb	Zhang et al., 2010
119	MG-143	E124°46′52″	N42°16′10″	monzogranite	261 ± 2	SHRIMP U-Pb	Wu et al., 2011
120	12JL1-1	E126°01′17″	N43°23′09″	biotite monzogranite	260 ± 1	LA-ICP-MS U-Pb	Wang et al., 2015
121	Y2046	E125°06′42.42″	N42°59′43.62″	granite	260.5 ± 2.4	LA-ICP-MS U-Pb	In this paper
122	CK91	E124°25′53″	N42°37′37″	migmatized diorite	260.8 ± 3.8	LA-ICP-MS U-Pb	Gu et al., 2018
123	XNC–43	E130°56′	N43°11′	diorite	260 ± 6	LA-ICP-MS U-Pb	Ma et al., 2019
124	XNC–57	E130°58′	N43°10′	granodiorite	261 ± 5	LA-ICP-MS U-Pb	Ma et al., 2019
125	11LK15-1	E124°13′06″	N42°43′47″	gabbro	260 ± 5	LA-ICP-MS U-Pb	Cao et al., 2013
126	12JL1-1	E126°01′10″	N43°23′56″	Syenogranite	260 ± 1	LA-ICP-MS U-Pb	Cao et al., 2013
127	17FK13	E123°29′44.3″	N42°28′39.7″	diorite	260.2 ± 1.6	LA-ICP-MS U-Pb	Jing et al., 2020c
128	FW00-45	E128°23′19″	N42°54′19″	quartz diorite	260 ± 2	LA-ICP-MS U-Pb	Wu et al., 2011
129	DY124-2	E125°50′52″	N43°05′57″	alkali feldspar granite	260 ± 3	LA-ICP-MS U-Pb	Wu et al., 2011
130	RZ38	E124°27′15″	N42°33′16″	monzodiorite	260 ± 2	LA-ICP-MS U-Pb	Liu et al., 2019
131	XNC–77	E130°57′	N43°03′	tonalite	259 ± 7	LA-ICP-MS U-Pb	Ma et al., 2019
132	WET-3A	E112°07′05″	N42°25.15′	monzonitic granite	259.9 ± 3.5	LA-ICP-MS U-Pb	Liu et al., 2015
133	WFZ-TW1	E123°33′	N42°39′	sandstone	259.7 ± 5.1	LA-ICP-MS U-Pb	Shi et al., 2022
134	LK36-1	E125°44′41″	N42°52′12″	biotite syenogranite	259 ± 2	LA-ICP-MS U-Pb	Cao et al., 2013
135	CK70	E124°28′57″	N42°32′43″	deformed granodiorite	259.1 ± 3.1	LA-ICP-MS U-Pb	Gu et al., 2018
136	DY126-2	E125°50′28″	N42°54′26″	syenogranite	259 ± 3	LA-ICP-MS U-Pb	Wu et al., 2011
137	LK37-1	E131°56′44″	N46°21′07″	olivine gabbro	258 ± 2	LA-ICP-MS U-Pb	Cao et al., 2013
138	YB03-238	E130°08′52″	N43°39′43″	diorite	257 ± 5	LA-ICP-MS U-Pb	Wu et al., 2011
139	N-8	E129°06′27″	N42°39′24″	quartz diorite	258 ± 0.9	LA-ICP-MS U-Pb	Guan et al., 2016
140	LK25-9	E124°54′02″	N43°26′37″	monzogabbro	257 ± 2	LA-ICP-MS U-Pb	Cao et al., 2013
141	09HC–18	E130°58′25″	N43°01′11″	gabbro	257 ± 2	LA-ICP-MS U-Pb	Guo et al., 2016
142	CK09	E123°30′39″	N42°16′27″	deformed granite	257.5 ± 4.0	LA-ICP-MS U-Pb	Gu et al., 2018
143	CK18	E124°08′38″	N42°30′11″	weakly deformed granite	256.6 ± 2.8	LA-ICP-MS U-Pb	Gu et al., 2018
144	18FK040	E123°28′38.2″	N42°28′19.1″	syenogranite	256.9 ± 1.5	LA-ICP-MS U-Pb	Jing et al., 2020b
145	18FK052	E123°22′40.9″	N42°23′26.9″	monzogranite	256 ± 3.2	LA-ICP-MS U-Pb	Jing et al., 2020b
146	14SP12-1	E125°40′29″	N43°32′39″	monzogranite	256 ± 2	LA-ICP-MS U-Pb	Zhou et al., 2018
147	XNC–12	E130°57′	N43°14′	dioritic enclave	257 ± 4	LA-ICP-MS U-Pb	Ma et al., 2019
148	XNC–98	E130°59′	N43°04′	gabbro enclave	257 ± 6	LA-ICP-MS U-Pb	Ma et al., 2019
149	LK24-1	E124°34′18″	N42°55′23″	granodiorite	255 ± 2	LA-ICP-MS U-Pb	Cao et al., 2013
150	PM201-4-TW1	E123°33′14″	N42°39′12″	gabbro diorite	256.8 ± 9.9	LA-ICP-MS U-Pb	Shi et al., 2022
151	SQ-1	E111°50′33″	N42°04.15′	muscovite granite	253.3 ± 4.8	LA-ICP-MS U-Pb	Liu et al., 2015
152	DYS1	E125°06′05″	N43°34′33″	rhyodacite	254.3 ± 2.5	LA-ICP-MS U-Pb	Song et al., 2018
153	DYS2	E125°06′05″	N43°34′33″	rhyodacite	255.4 ± 4.2	LA-ICP-MS U-Pb	Song et al., 2018
154	SD7	E125°13′22″	N43°36′37″	andesite	255.5 ± 3	LA-ICP-MS U-Pb	Song et al., 2018
155	XQ1	E125°14′58″	N43°34′49″	rhyolite	254.7 ± 2.6	LA-ICP-MS U-Pb	Song et al., 2018
156	XDM1	E125°15′00″	N43°36′32″	andesite	254 ± 3.6	LA-ICP-MS U-Pb	Song et al., 2018
157	DST1	E125°07′37″	N43°30′32″	syenogranite	256.5 ± 3.3	LA-ICP-MS U-Pb	Song et al., 2018
158	09HCH–12	E130°19′25″	N43°01′09″	gabbro	254 ± 3	LA-ICP-MS U-Pb	Guo et al., 2016
159	FX06-18	E121°47′32″	N42°15′42″	maﬁc rock	254 ± 3	LA-ICP-MS U-Pb	Zhang et al., 2012
160	FX06-59	E121°39′11″	N42°19′59″	maﬁc rock	257 ± 4	LA-ICP-MS U-Pb	Zhang et al., 2012
161	FX06-21	E121°47′32″	N42°15′42″	monzogranite	256 ± 4	LA-ICP-MS U-Pb	Zhang et al., 2012
162	11JJH4-1	E127°21′24″	N43°59′76″	gabbro diorite	256 ± 2	LA-ICP-MS U-Pb	Wang et al., 2013
163	MG-119	E124°45′34″	N42°17′48″	monzogranite	254 ± 8	SHRIMP U-Pb	Wu et al., 2011
164	FK54	E123°15′45″	N42°29′49″	hornblende	256	40Ar/39Ar	Zhang et al., 2005
165	FK51-1	E123°25′53″	N42°30′13″	biotite	256	40Ar/39Ar	Zhang et al., 2005
166	FW00-104	E129°28′24″	N43°01′30″	alkali feldspar granite	253 ± 2	LA-ICP-MS U-Pb	Wu et al., 2011
167	FW02-191	E128°00′53″	N43°06′43″	alkali feldspar granite	253 ± 2	LA-ICP-MS U-Pb	Wu et al., 2011
168	FW02-194	E128°27′16″	N43°26′46″	quartz diorite	253 ± 2	LA-ICP-MS U-Pb	Wu et al., 2011
169	XDC1	E125°16′15″	N43°37′10″	basaltic lava	253 ± 4.5	LA-ICP-MS U-Pb	Song et al., 2018
170	Y2058	E125°57′15.22″	N43°08′26.25″	K-feldspar granite	253.2 ± 1.7	LA-ICP-MS U-Pb	In this paper
171	Y2059	E125°55′00.63″	N43°03′18.55″	K-feldspar granite	250.8 ± 1.8	LA-ICP-MS U-Pb	In this paper
172	JH3S-1	E127°09′45″	N43°00′55″	dacite	252土5	SHRIMP U-Pb	Li et al., 2007
173	RZ08	E124°40′40″	N42°25′10″	monzogranite	251 ± 1.3	LA-ICP-MS U-Pb	Liu et al., 2016
174	RZ08	E124°40′40″	N42°25′10″	monzodiorite	251 ± 1	LA-ICP-MS U-Pb	Liu et al., 2019
175	FX06-52	E121°38′38″	N42°17′36″	maﬁc rock	252 ± 2	LA-ICP-MS U-Pb	Zhang et al., 2012
176	13JH1-1	E125°59′53″	N43°26′42″	quartz monzonite	252 ± 1	LA-ICP-MS U-Pb	Wang et al., 2015
177	13JH3-1	E127°20′48″	N43°59′42″	hornblende gabbro	252 ± 1	LA-ICP-MS U-Pb	Wang et al., 2015
178	JK13-1	E127°41′31″	N42°58′59″	mylonitized monzogranite	252 ± 1	LA-ICP-MS U-Pb	Wang et al., 2015
179	CK17	E124°08′59″	N42°31′41″	deformed granite	252.3 ± 3.9	LA-ICP-MS U-Pb	Gu et al., 2018
180	CK30	E123°34′05″	N42°10′56″	weakly deformed granite	251.5 ± 4.1	LA-ICP-MS U-Pb	Gu et al., 2018
181	DY143-2	E125°06′22″	N43°02′31″	monzogranite	252 ± 2	LA-ICP-MS U-Pb	Wu et al., 2011
182	YZ02-49	E129°30′00″	N42°39′39″	quartz diorite	251 ± 2	LA-ICP-MS U-Pb	Zhang et al., 2004
183	DY143-2	E125°06′22″	N43°02′31″	monzogranite	252 ± 2	LA-ICP-MS U-Pb	Wu et al., 2011
184	DY123-4	E125°57′29″	N43°06′40″	alkali feldspar granite	251 ± 2	LA-ICP-MS U-Pb	Wu et al., 2011
185	KY13-12–4	E124°17′31″	N42°34′25″	basaltic andesite	250 ± 4	LA-ICP-MS U-Pb	Yuan et al., 2016
186	CK66	E124°28′23″	N42°29′54″	migmatized granodiorite	250.5 ± 2.9	LA-ICP-MS U-Pb	Gu et al., 2018
187	LK04-2	E124°25′25″	N42°49′21″	biotite monzogranite	249 ± 1	LA-ICP-MS U-Pb	Cao et al., 2013
188	12LY2-1	E125°24′13″	N43°02′42″	biotite monzogranite	247 ± 1	LA-ICP-MS U-Pb	Cao et al., 2013
189	PM201-3-TW1	E123°33′15″	N42°39′12″	basalt	249.8 ± 6.7	LA-ICP-MS U-Pb	Shi et al., 2022
190	GJT-1	E112°22′50″	N41°53.45′	muscovite granite	249.6 ± 4.8	LA-ICP-MS U-Pb	Liu et al., 2015
191	HL-1	E129°10′08″	N42°35′20″	granite	249 ± 1.1	LA-ICP-MS U-Pb	Guan et al., 2016
192	YZ02-2	E128°30′32″	N42°52′15″	monzogranite	249 ± 4	LA-ICP-MS U-Pb	Zhang et al., 2004
193	FK04-24	E123°27′	N42°23′	granite	249 ± 2	LA-ICP-MS U-Pb	Zhang et al., 2010
194	FK06-39	E123°27′	N42°21′	quartz monzonite	248 ± 2	LA-ICP-MS U-Pb	Zhang et al., 2010
195	13YB3-2	E128°52′20″	N42°46′13″	quartz monzonite	249 ± 1	LA-ICP-MS U-Pb	Wang et al., 2015
196	YZ02-27–2	E128°49′32″	N42°03′10″	monzogranite	248 ± 2	LA-ICP-MS U-Pb	Zhang et al., 2004
197	KY12-33–4	E124°15′24″	N42°34′57″	andesite	ca. 249	LA-ICP-MS U-Pb	Yuan et al., 2016
198	BJGC-TW1	E123°37′	N42°34′	granite	248.2 ± 1.5	LA-ICP-MS U-Pb	Shi et al., 2022
199	XGC-TW1	E123°38′	N42°33′	molassic deposit	248.8 ± 2.1	LA-ICP-MS U-Pb	Shi et al., 2022
200	FW00-34	E127°53′47″	N43°08′45″	diorite	247 ± 1	SHRIMP U-Pb	Wu et al., 2011
201	FW00-110	E128°51′02″	N43°07′33″	monzogranite	247 ± 1	TIMS	Wu et al., 2011
202	JK5-1	E128°12′12″	N42°56′04″	amphibole gabbro	246 ± 1	LA-ICP-MS U-Pb	Wang et al., 2013
203	YZ02-40	E129°09′22″	N42°11′05″	granodiorite	246 ± 3	LA-ICP-MS U-Pb	Zhang et al., 2004
204	YZ02-22–2	E128°49′21″	N42°12′14″	monzogranite	245 ± 6	LA-ICP-MS U-Pb	Zhang et al., 2004
205	YZ02-25–2	E128°44′58″	N42°10′57″	monzogranite	245 ± 3	LA-ICP-MS U-Pb	Zhang et al., 2004
206	13JH28-1	E128°57′31″	N42°45′59″	mylonitized monzogranite	245 ± 1	LA-ICP-MS U-Pb	Wang et al., 2015
207	MG-28	E124°55′44″	N42°22′19″	granodiorite	243 ± 5	SHRIMP U-Pb	Wu et al., 2011
208	MG-64	E125°11′14″	N42°32′52″	monzogranite	242 ± 7	SHRIMP U-Pb	Wu et al., 2011
209	MG-103	E124°40′46″	N42°25′11″	granodiorite	243 ± 5	SHRIMP U-Pb	Wu et al., 2011
210	18KY008	E124°13′	N42°32′	syenogranite	243.1 ± 3.1	LA-ICP-MS U-Pb	Jing et al., 2022
211	18KY011	E124°15′	N42°33′	monzogranite	242.7 ±1.6	LA-ICP-MS U-Pb	Jing et al., 2022
212	18KY015	E124°22′	N42°37′	syenogranite	243.1 ± 2.6	LA-ICP-MS U-Pb	Jing et al., 2022
213	18KY029	E124°29′	N42°30′	monzogranite	242.6 ± 1.9	LA-ICP-MS U-Pb	Jing et al., 2022
214	18KY008-1	E124°13′	N42°32′	syenogranite	243.1 ± 1.3	LA-ICP-MS U-Pb	Jing et al., 2022
215	B5157-1	E129°19′49″	N42°37′26″	monzogranite	243 ± 1.1	LA-ICP-MS U-Pb	Guan et al., 2016
216	18KY011-1	E124°15′	N42°33′	monzogranite	241.9 ± 1.4	LA-ICP-MS U-Pb	Jing et al., 2022
217	18KY015-1	E124°22′	N42°37′	syenogranite	242.5 ± 3.1	LA-ICP-MS U-Pb	Jing et al., 2022
218	18KY029-1	E124°29′	N42°30′	monzogranite	242.8 ± 1.3	LA-ICP-MS U-Pb	Jing et al., 2022
219	Fk04-5	E123°29′32″	N42°29′46″	hornblende gabbro	241 ± 6	SHRIMP U-Pb	Zhang et al., 2009
220	D0832-6	E130°59′52″	N43°15′27″	quartz diorite	241 ± 1	LA-ICP-MS U-Pb	Fu et al., 2010
221	D0849-1	E130°53′17″	N43°12′52″	quartz diorite	240 ± 1	LA-ICP-MS U-Pb	Fu et al., 2010
222	FW00-122	E128°56′48″	N43°18′00″	monzogranite	240 ± 2	LA-ICP-MS U-Pb	Wu et al., 2011
223	FW00-122	E128°56′48″	N43°18′00″	monzogranite	240 ± 2	LA-ICP-MS U-Pb	Wu et al., 2011
224	LK16-1	E124°34′30″	N42°02′30″	harzburgite	222 ± 3	LA-ICP-MS U-Pb	Cao et al., 2013
