# Supplementary material
Source: MDPI journal article supplement (https://www.mdpi.com/2075-163X/12/8/1040)
Supplement: s1 [file s1 › Supplementary Table S2.xlsx]

## Sheet: Table S2
LA-ICP-MS zircon U-Pb dating data for the samples
Sample	Th/ppm	U/ppm	Th/U	207Pb/206Pb		207Pb/235U		206Pb/238U		207Pb/206Pb		207Pb/235U		206Pb/238U
				Ratio	1σ	Ratio	1σ	Ratio	1σ	Age(Ma)	1σ	Age(Ma)	1σ	Age(Ma)	1σ
Y2001 (434.7 Ma)
Y2001-02	73.1409	137.519	0.531859	0.0578	0.00170998	0.562331	0.0168779	0.0703493	0.00097075	520.41	64.8075	453.043	10.9735	438.26	5.85134
Y2001-03	73.8741	146.154	0.505454	0.0566406	0.00184941	0.547577	0.0171577	0.0702443	0.000964017	475.97	39.81	443.408	11.2614	437.627	5.81138
Y2001-04	56.4075	129.243	0.436445	0.0577281	0.00221972	0.554304	0.0215947	0.0695425	0.00107743	520.41	89.8	447.812	14.1105	433.399	6.49816
Y2001-05	94.58	166.273	0.568823	0.0566015	0.00178398	0.542996	0.0162702	0.0697306	0.000862713	475.97	68.5125	440.398	10.7109	434.532	5.20418
Y2001-06	58.5931	120.852	0.484832	0.0545489	0.00207405	0.523318	0.0199607	0.0694482	0.00103057	394.495	85.1775	427.365	13.3082	432.83	6.21647
Y2001-07	48.6961	104.805	0.464637	0.0542198	0.00211932	0.522693	0.0204904	0.0696593	0.000960364	388.94	82.4	426.949	13.6668	434.103	5.79248
Y2001-08	148.797	229.983	0.646992	0.0552247	0.00182005	0.530768	0.017386	0.0694139	0.000922866	420.42	74.0675	432.319	11.5362	432.623	5.56793
Y2001-11	45.965	99.3403	0.462702	0.0559846	0.00253472	0.535688	0.023905	0.0695986	0.00121892	450.045	101.843	435.578	15.8086	433.737	7.35007
Y2001-12	69.7762	141.118	0.494452	0.0562363	0.00224316	0.534278	0.0193658	0.0695866	0.00107637	461.155	87.0275	434.645	12.8197	433.665	6.49154
Y2001-13	42.2846	95.099	0.444638	0.0608479	0.00426702	0.578219	0.0403627	0.0691773	0.00136141	635.2	156.46	463.316	25.9702	431.197	8.21169
Y2001-14	61.2436	126.86	0.482765	0.0563832	0.0020105	0.546813	0.0198746	0.0701188	0.000928334	477.82	79.62	442.907	13.0499	436.871	5.59727
Y2001-15	87.2681	164.795	0.529556	0.054735	0.00188424	0.523189	0.0173364	0.0694683	0.00102006	466.71	75.92	427.279	11.5604	432.951	6.15303
Y2001-16	77.8405	118.927	0.654522	0.0579298	0.00274431	0.553112	0.0242056	0.0696013	0.00108805	527.815	103.688	447.033	15.8279	433.753	6.56181
Y2001-17	105.422	162.354	0.649332	0.0625412	0.00208018	0.595703	0.0183562	0.0693429	0.0010566	694.455	70.3625	474.503	11.6849	432.195	6.37384
Y2001-18	59.0256	111.195	0.530831	0.0597324	0.00248575	0.579816	0.0242678	0.0703164	0.00116052	594.47	90.7275	464.343	15.6007	438.061	6.99371
Y2001-19	77.4147	117.058	0.661334	0.0591746	0.00235284	0.565595	0.0221222	0.069654	0.00100608	572.255	87.0225	455.162	14.3509	434.071	6.0678
Y2001-20	44.19	104.535	0.422729	0.0587716	0.00221918	0.556919	0.0187894	0.0693931	0.000893799	566.7	81.4675	449.519	12.2578	432.498	5.39297
Y2001-23	59.3768	116.212	0.510934	0.0541819	0.00199167	0.524183	0.0203129	0.0699484	0.00110499	388.94	81.4725	427.942	13.5352	435.845	6.66168
Y2001-24	63.465	127.232	0.498813	0.0583464	0.00198095	0.568001	0.0202265	0.0700805	0.000955382	542.63	69.4325	456.721	13.1017	436.64	5.76027
Y2001-25	55.3647	101.833	0.543683	0.0567395	0.00253572	0.546613	0.0233999	0.070204	0.00107466	479.67	93.51	442.776	15.3655	437.384	6.47756
Y2002 (394.2 Ma)
Y2002-01	504.918	851.257	0.593144	0.0536343	0.00104535	0.465953	0.00970607	0.0625926	0.000760769	366.72	44.44	388.39	6.72803	391.373	4.62018
Y2002-02	536.293	379.732	1.4123	0.0531907	0.00137988	0.466937	0.0122281	0.0633338	0.000763357	344.5	59.2525	389.071	8.46814	395.868	4.63275
Y2002-03	826.565	1385.06	0.596772	0.0553705	0.0010135	0.490916	0.0112974	0.0637761	0.000949225	427.825	45.365	405.534	7.69898	398.549	5.75627
Y2002-04	1150.76	904.244	1.27263	0.0542465	0.00100071	0.471164	0.00885067	0.0627694	0.00073451	388.94	40.7375	391.993	6.11446	392.446	4.46034
Y2002-05	241.321	378.564	0.637465	0.0560199	0.00137191	0.491191	0.0129387	0.0630463	0.000791023	453.75	53.6975	405.721	8.81458	394.125	4.80156
Y2002-06	584.754	477.231	1.22531	0.0551961	0.00131472	0.476791	0.0112012	0.0626088	0.000868432	420.42	53.6975	395.869	7.7062	391.471	5.27266
Y2002-07	843.147	723.324	1.16566	0.0538678	0.00111136	0.469074	0.0102951	0.0627608	0.00084019	364.87	48.1425	390.549	7.12066	392.393	5.10077
Y2002-08	287.163	654.876	0.438499	0.0537312	0.00112358	0.469918	0.010139	0.0629317	0.000747168	366.72	41.6625	391.132	7.0088	393.43	4.53636
Y2002-09	461.124	794.039	0.580733	0.0543807	0.00112572	0.478074	0.00989422	0.0635149	0.000829418	387.09	46.2925	396.751	6.80233	396.966	5.03202
Y2002-10	412.755	756.374	0.545702	0.0539693	0.000987238	0.475048	0.00909836	0.0634473	0.000744561	368.57	40.7375	394.67	6.26881	396.557	4.51846
Y2002-11	468.74	953.319	0.491693	0.0542994	0.00104688	0.472421	0.00986412	0.0627739	0.000716841	383.385	47.2175	392.86	6.80755	392.473	4.35327
Y2002-12	625.926	506.191	1.23654	0.0532231	0.00118366	0.461273	0.0102181	0.0627971	0.000780569	338.945	49.995	385.143	7.10499	392.614	4.7393
Y2002-13	509.59	660.279	0.771781	0.0530333	0.0011344	0.46209	0.0108408	0.062894	0.000758144	331.54	54.625	385.71	7.53325	393.202	4.60302
Y2002-14	684.236	1043.02	0.656018	0.0530111	0.00103821	0.461213	0.00995814	0.0628809	0.000757338	327.835	44.44	385.101	6.92477	393.122	4.59818
Y2002-15	286.159	689.713	0.414896	0.0536652	0.00123216	0.465762	0.0117319	0.0627988	0.000875692	366.72	51.8475	388.257	8.13137	392.624	5.31575
Y2002-16	303.303	565.203	0.536626	0.0537777	0.0013072	0.463845	0.0108666	0.0628253	0.00086013	361.165	55.55	386.929	7.54214	392.785	5.22131
Y2002-18	628.459	965.007	0.651247	0.0550128	0.00112584	0.481904	0.0108616	0.0634285	0.000809653	413.01	46.29	399.378	7.44722	396.443	4.91272
Y2002-19	461.835	848.192	0.544493	0.0526247	0.00106762	0.463239	0.00970709	0.0638057	0.000736401	322.28	50.92	386.508	6.74115	398.729	4.46761
Y2002-21	388.416	512.96	0.757205	0.0536447	0.00126378	0.471881	0.0112304	0.0637741	0.000797399	366.72	53.7	392.487	7.75193	398.537	4.83699
Y2002-22	304.427	316.168	0.962867	0.0511294	0.00155491	0.445336	0.0143309	0.0629757	0.000849636	255.62	73.135	374.008	10.071	393.697	5.157
Y2002-24	264.13	476.619	0.554174	0.052475	0.00156199	0.459005	0.0135054	0.0636162	0.00107653	305.615	68.5125	383.565	9.4026	397.58	6.52824
Y2046 (260.2 Ma)
Y2046-01	252.341	620.835	0.406453	0.0462332	0.00198095	0.261459	0.0111098	0.0409805	0.000691574	9.36	99.99	235.842	8.944	258.908	4.28495
Y2046-02	705.429	864.998	0.815527	0.0537816	0.00358924	0.303943	0.018601	0.0408698	0.000959382	361.165	147.205	269.475	14.4858	258.222	5.94337
Y2046-05	127.798	301.26	0.424213	0.0505704	0.00269388	0.289535	0.015276	0.0414393	0.000609586	220.44	119.427	258.193	12.0296	261.748	3.77593
Y2046-07	244.71	698.176	0.350499	0.0539088	0.00199369	0.305866	0.0112395	0.0411688	0.000538886	368.57	83.325	270.971	8.74126	260.074	3.33948
Y2046-10	162.923	338.711	0.48101	0.0551964	0.00506577	0.31998	0.0289797	0.0414539	0.00132964	420.42	200.898	281.887	22.2932	261.839	8.23146
Y2046-11	49.4137	157.397	0.313944	0.0545577	0.00431023	0.31268	0.0242491	0.0415448	0.000817068	394.495	177.757	276.256	18.7581	262.401	5.05905
Y2046-12	738.208	985.896	0.748768	0.0479866	0.00239121	0.277225	0.0140367	0.0410681	0.000836618	98.24	114.795	248.454	11.1603	259.45	5.18233
Y2046-13	88.3873	305.806	0.28903	0.0510651	0.00422115	0.291207	0.0240114	0.0409786	0.000798816	242.66	195.345	259.509	18.883	258.896	4.94876
Y2046-14	178.181	631.496	0.282157	0.0527263	0.00256822	0.300874	0.0143359	0.0409858	0.000690429	316.725	111.097	267.083	11.1912	258.941	4.27784
Y2046-15	913.883	1194.69	0.764953	0.0600824	0.00249682	0.349381	0.0148758	0.0411771	0.000603967	605.575	86.0975	304.255	11.1957	260.125	3.74208
Y2046-16	173.408	512.382	0.338434	0.0476565	0.00425478	0.27247	0.0247047	0.0410021	0.00106255	83.425	196.265	244.667	19.7141	259.042	6.58131
Y2046-17	116.151	338.644	0.342988	0.0589493	0.0124776	0.329438	0.0607154	0.041155	0.00190973	564.85	474.485	289.137	46.373	259.988	11.8251
Y2046-20	67.9592	237.812	0.285769	0.054453	0.00453917	0.314118	0.0241619	0.0417019	0.00113559	390.79	188.865	277.368	18.6702	263.373	7.02887
Y2046-21	65.291	352.4	0.185275	0.0513332	0.00485847	0.290622	0.0274308	0.0410161	0.000958223	257.47	213.863	259.049	21.5816	259.128	5.93537
Y2046-22	99.202	278.998	0.355566	0.0499485	0.00372482	0.278091	0.0193318	0.0409999	0.000777501	190.82	178.68	249.142	15.3591	259.028	4.81672
Y2046-25	266.734	564.323	0.472661	0.0496752	0.00218967	0.290504	0.0128117	0.0416017	0.000739584	188.97	103.688	258.956	10.0819	262.753	4.57944
Y2047 (264.5 Ma)
Y2047-01	51.9791	183.412	0.2834	0.0482198	0.00325559	0.273919	0.0168292	0.042275	0.000927834	109.35	151.825	245.822	13.4148	266.919	5.74041
Y2047-02	280.734	915.693	0.30658	0.0524185	0.00196847	0.307617	0.0116514	0.0422371	0.000744536	301.91	85.175	272.332	9.04939	266.685	4.60733
Y2047-03	60.8264	315.993	0.192493	0.0526363	0.00346923	0.305456	0.0189366	0.0423189	0.000907018	322.28	145.35	270.653	14.73	267.191	5.61147
Y2047-04	272.34	701.345	0.388311	0.0470168	0.00318579	0.279613	0.0231777	0.0422684	0.00201321	50.095	161.09	250.351	18.3925	266.878	12.4525
Y2047-05	307.356	1054.76	0.2914	0.050278	0.00294231	0.289169	0.0145347	0.0413774	0.000810381	209.33	137.018	257.905	11.4492	261.365	5.01847
Y2047-06	286.871	410.22	0.699311	0.0485494	0.00338808	0.277892	0.019227	0.0412112	0.000871172	127.865	155.53	248.984	15.2783	260.336	5.39549
Y2047-07	653.438	574.356	1.13769	0.0479334	0.00566992	0.284765	0.0351105	0.0420972	0.00131925	94.535	259.225	254.431	27.7492	265.819	8.16213
Y2047-08	618.017	1613.04	0.383139	0.0522193	0.00217571	0.302987	0.0128772	0.041508	0.000697942	294.505	94.43	268.73	10.0365	262.174	4.32223
Y2047-09	299.668	794.102	0.377367	0.0528264	0.00288712	0.304021	0.0166343	0.041423	0.0008013	320.43	125.91	269.536	12.9537	261.647	4.96206
Y2047-10	56.9434	202.13	0.281717	0.0465847	0.00461451	0.2719	0.026137	0.0418837	0.00125955	27.875	222.19	244.212	20.8663	264.499	7.7945
Y2047-13	1058.83	1281.1	0.826507	0.0519661	0.0023196	0.30535	0.0137646	0.0422818	0.000687295	283.395	97.2075	270.571	10.7085	266.961	4.2533
Y2047-14	182.966	1566.56	0.116795	0.0514783	0.00211428	0.302622	0.012494	0.0421456	0.000573674	261.175	94.43	268.446	9.74068	266.118	3.55149
Y2047-16	65.7499	121.292	0.542082	0.0537184	0.00879403	0.297532	0.0427556	0.0413606	0.00195721	366.72	333.29	264.471	33.4588	261.261	12.1167
Y2047-15	216.237	640.679	0.337512	0.0523011	0.00241847	0.306895	0.0138844	0.0419035	0.000715186	298.21	137.945	271.772	10.789	264.621	4.42727
Y2047-17	145.616	376.637	0.38662	0.0484646	0.00427335	0.275657	0.0221532	0.0420046	0.00118206	120.46	196.265	247.207	17.634	265.247	7.31429
Y2047-18	211.686	620.99	0.340885	0.0482742	0.00208253	0.277177	0.0122167	0.0418386	0.000663533	122.31	101.838	248.415	9.71397	264.22	4.10811
Y2047-20	181.072	650.519	0.27835	0.0586901	0.00474052	0.344523	0.0257561	0.0422725	0.000821419	566.7	177.755	300.594	19.4521	266.904	5.08249
Y2047-22	440.861	1294.28	0.340623	0.0557647	0.00213299	0.32091	0.0121585	0.0416462	0.000619532	442.64	78.695	282.602	9.3482	263.029	3.83671
Y2047-24	221.074	632.114	0.349738	0.0510203	0.00173666	0.293308	0.010028	0.0417825	0.000564574	242.66	77.765	261.16	7.87504	263.872	3.49641
Y2047-25	602.164	927.377	0.649319	0.0571825	0.00236525	0.329828	0.0136279	0.0418387	0.000765364	498.19	90.73	289.434	10.4073	264.22	4.73787
Y2058 (253.6 Ma)
Y2058-01	572.871	910.397	0.629254	0.0554159	0.00205079	0.311324	0.0116425	0.0403403	0.000653928	427.825	83.325	275.206	9.01693	254.942	4.05437
Y2058-02	229.528	608.636	0.377119	0.0496371	0.00196607	0.276081	0.0107838	0.0399294	0.00053829	188.97	124.983	247.544	8.58234	252.395	3.33959
Y2058-04	259.094	634.009	0.408659	0.0500901	0.0019377	0.27617	0.00967281	0.0399378	0.000637805	198.23	90.7275	247.615	7.698	252.447	3.956
Y2058-05	454.562	814.837	0.557856	0.0613177	0.00253911	0.34859	0.0159807	0.0401764	0.000535372	650.015	85.015	303.66	12.034	253.926	3.32076
Y2058-06	159.673	515.48	0.309755	0.0517168	0.00233809	0.282556	0.0116361	0.0397381	0.000549657	272.285	103.688	252.683	9.21373	251.209	3.41059
Y2058-07	213.348	547.735	0.389509	0.051439	0.00199971	0.285359	0.0105576	0.0401169	0.000610833	261.175	88.875	254.9	8.34188	253.557	3.78828
Y2058-08	222.145	554.584	0.400561	0.0530031	0.00233973	0.298304	0.0126419	0.0403981	0.00062495	327.835	99.99	265.074	9.88865	255.3	3.87471
Y2058-10	413.124	828.14	0.498858	0.0557136	0.0024017	0.315406	0.0137168	0.0402975	0.000617275	442.64	128.688	278.363	10.5899	254.677	3.82754
Y2058-11	398.759	798.395	0.499451	0.0511487	0.00186498	0.285834	0.0101419	0.0401041	0.000504382	255.62	83.32	255.275	8.01063	253.478	3.12908
Y2058-13	200.776	527.721	0.380459	0.0510222	0.00245579	0.289231	0.01416	0.0405177	0.000673431	242.66	111.095	257.954	11.1536	256.041	4.17446
Y2058-14	282.794	630.389	0.448603	0.0518412	0.00217255	0.290936	0.0116235	0.0403612	0.000579931	279.69	91.6525	259.296	9.14417	255.071	3.59608
Y2058-15	143.485	480.141	0.29884	0.0472673	0.00205824	0.262714	0.0110539	0.0399794	0.000592087	61.205	103.695	236.852	8.89018	252.705	3.67265
Y2058-16	191.101	526.114	0.363231	0.0523209	0.0020579	0.291029	0.0110988	0.0401751	0.000627096	298.21	90.73	259.369	8.73092	253.918	3.8888
Y2058-18	189.351	566.697	0.33413	0.0493754	0.00235392	0.276336	0.0126717	0.040214	0.000667664	164.9	111.095	247.747	10.0823	254.159	4.13992
Y2058-19	247.369	617.292	0.400733	0.0508011	0.00194143	0.282311	0.0103948	0.0401094	0.000586298	231.55	87.0225	252.489	8.23278	253.511	3.63635
Y2058-20	170.207	452.25	0.376356	0.0578668	0.00235363	0.326165	0.0131852	0.0402308	0.000585901	524.11	90.725	286.634	10.0972	254.264	3.63348
Y2058-21	335.412	572.009	0.586376	0.0512709	0.00194312	0.284333	0.0102056	0.0399758	0.000518391	253.77	87.0225	254.089	8.07035	252.683	3.21621
Y2058-22	220.877	569.274	0.387997	0.0501867	0.00181868	0.278897	0.010264	0.0397885	0.000573642	211.185	85.1725	249.782	8.15091	251.522	3.55902
Y2058-23	156.778	451.779	0.347023	0.049637	0.00216842	0.278529	0.011962	0.0402826	0.000621476	188.97	101.838	249.49	9.50148	254.585	3.85361
Y2058-24	355.977	639.016	0.55707	0.0530104	0.00201016	0.297375	0.0109589	0.0402459	0.000596693	327.835	85.175	264.348	8.57881	254.357	3.70026
Y2058-25	243.657	635.948	0.38314	0.0491995	0.00182702	0.272709	0.00901211	0.0401805	0.000644417	166.75	82.395	244.857	7.19191	253.952	3.99606
Y2059 (250.8 Ma)
Y2059-01	550.5	1168.14	0.471264	0.0534655	0.00171505	0.29116	0.00939536	0.0393297	0.000508199	350.055	72.215	259.472	7.39073	248.677	3.15495
Y2059-03	255.758	699.212	0.36578	0.0511622	0.00199881	0.278284	0.0109593	0.0392837	0.000557767	255.62	95.355	249.295	8.70696	248.391	3.46229
Y2059-04	190.171	636.701	0.298682	0.0514563	0.00193436	0.283608	0.0110466	0.0399074	0.000791992	261.175	87.0225	253.516	8.73998	252.259	4.91147
Y2059-05	153.691	486.966	0.315609	0.0544378	0.00232455	0.296351	0.0120829	0.0397334	0.000606154	390.79	91.6575	263.546	9.46579	251.181	3.76064
Y2059-06	1018.45	2265.72	0.449504	0.0506964	0.00136958	0.2813	0.00709203	0.0399314	0.000476683	227.845	61.1	251.688	5.62278	252.408	2.95804
Y2059-07	659.013	1054.49	0.62496	0.0523921	0.00182404	0.292152	0.00991588	0.0399918	0.000548816	301.91	84.25	260.252	7.79399	252.782	3.40459
Y2059-08	212.802	635.083	0.335078	0.0537207	0.00273882	0.291236	0.0145906	0.0395049	0.000681569	366.72	119.433	259.532	11.4749	249.763	4.22885
Y2059-12	435.533	850.316	0.512201	0.0507626	0.00171018	0.282856	0.00966308	0.0401172	0.000509151	231.55	77.765	252.92	7.65028	253.559	3.15857
Y2059-14	176.263	537.895	0.327689	0.049766	0.00217314	0.271884	0.011369	0.0395387	0.000527591	183.415	101.838	244.199	9.07776	249.973	3.27449
Y2059-15	201.744	603.852	0.334095	0.0533021	0.00232748	0.290601	0.0116607	0.0396156	0.000538013	342.65	99.99	259.033	9.17576	250.45	3.33883
Y2059-16	171.265	537.482	0.318644	0.0503863	0.00218919	0.277163	0.0113181	0.039929	0.000582573	213.035	99.985	248.405	8.99983	252.393	3.61388
Y2059-18	168.305	333.48	0.504691	0.0544555	0.00244099	0.299231	0.0124357	0.0399982	0.000656884	390.79	99.99	265.799	9.72049	252.822	4.07398
Y2059-19	244.275	587.712	0.415638	0.0511846	0.00195434	0.27464	0.00925681	0.0392161	0.000534303	250.065	88.875	246.397	7.37591	247.972	3.31707
Y2059-20	512.325	1592.4	0.32173	0.0491475	0.00138329	0.271964	0.00779171	0.0395485	0.000427042	153.79	66.655	244.263	6.22218	250.034	2.6516
Y2059-21	502.684	1675.33	0.300051	0.0516926	0.00149887	0.287527	0.00798657	0.0399451	0.000479967	272.285	66.6575	256.611	6.30087	252.493	2.97834
Y2059-23	348.047	784.339	0.443745	0.0463567	0.00161566	0.252167	0.00864549	0.0392085	0.000485459	16.765	81.475	228.335	7.01235	247.925	3.01437
Y2059-25	184.396	586.084	0.314624	0.0490087	0.0018626	0.270487	0.0101313	0.0397417	0.000526426	150.085	88.875	243.083	8.09869	251.232	3.26667
