# Supplementary material
Source: MDPI journal article supplement (https://www.mdpi.com/2075-163X/12/8/1040)
Supplement: s1 [file s1 › Supplementary Table S3.xlsx]

## Sheet: Table S3
Zircon Hf isotope results for the samples
Sample	176Yb/177Hf	2σ	176Lu/177Hf	2σ	176Hf/177Hf	2σ	εHf(t)	TDM1	TDM2
Y2001 (434.7 Ma)
Y2001-03	0.0377767	0.000543872	0.00143057	9.62643e-06	0.282575	1.57934e-05	2.21336	968.896	1275.79
Y2001-05	0.0392785	0.000391235	0.00140849	1.04874e-05	0.282559	1.79068e-05	1.63117	991.961	1312.54
Y2001-06	0.0399704	0.000356244	0.00143634	1.21664e-05	0.28256	1.86024e-05	1.65956	991.238	1310.75
Y2001-07	0.0405337	0.000506988	0.00143456	1.357e-05	0.282535	1.55433e-05	0.776475	1026.68	1366.44
Y2001-08	0.0362387	0.000342689	0.00132446	1.41877e-05	0.282574	1.29703e-05	2.19098	968.274	1277.2
Y2001-12	0.0384083	0.000487616	0.00135133	9.84948e-06	0.282491	1.48747e-05	-0.759518	1086.87	1463.17
Y2001-14	0.0329878	0.000928969	0.00125317	2.76824e-05	0.282547	1.91966e-05	1.25729	1004.6	1336.12
Y2001-15	0.04712	0.000608066	0.00172306	1.48605e-05	0.282561	1.68347e-05	1.63535	996.54	1312.28
Y2001-16	0.0481003	0.000445792	0.00159171	1.1106e-05	0.282564	1.65195e-05	1.76084	989.484	1304.36
Y2001-17	0.0353773	0.000407996	0.00122254	1.35184e-05	0.282519	1.5622e-05	0.288359	1042.82	1397.2
Y2002 (394.2 Ma)
Y2002-01	0.0517002	0.000352361	0.00184004	5.27288e-06	0.282586	1.4633e-05	1.64924	963.72	1280.71
Y2002-02	0.0741872	0.0016922	0.00279535	3.03659e-05	0.282641	2.33952e-05	3.34487	908.077	1173.54
Y2002-03	0.0955537	0.00227161	0.00339926	8.08573e-05	0.282517	2.55411e-05	-1.19784	1109.6	1460.18
Y2002-08	0.0510638	0.000640091	0.00189649	1.58833e-05	0.282556	1.67475e-05	0.580872	1008.08	1348.12
Y2002-09	0.0707776	0.000680534	0.00243974	1.20333e-05	0.282566	1.53627e-05	0.786319	1008.79	1335.17
Y2002-10	0.0706586	0.00155225	0.00243898	4.09189e-05	0.28256	1.47143e-05	0.552106	1018.45	1349.94
Y2002-11	0.0629913	0.000820263	0.00219983	2.64075e-05	0.282542	1.45588e-05	-0.00282486	1037.12	1384.92
Y2002-12	0.0622626	0.00131384	0.00214056	3.99012e-05	0.282566	1.56589e-05	0.839423	1001.59	1331.82
Y2002-13	0.0730847	0.00136374	0.00250241	3.50184e-05	0.282556	1.54275e-05	0.407633	1025.52	1359.05
Y2002-14	0.0595444	0.000966449	0.00207181	3.07771e-05	0.282562	1.51439e-05	0.717273	1005.44	1339.52
Y2002-16	0.0596673	0.00146011	0.00214464	4.3135e-05	0.282594	1.55418e-05	1.8393	960.678	1268.71
Y2046 (260.2 Ma)
Y2046-01	0.0383044	0.000440621	0.00167568	1.86016e-05	0.282811	1.33671e-05	6.80926	636.848	849.97
Y2046-02	0.103292	0.00114766	0.00360568	3.53873e-05	0.282768	1.74342e-05	4.97627	736.359	966.55
Y2046-05	0.0344337	0.000395475	0.00126397	1.15762e-05	0.282785	1.39985e-05	5.98629	665.831	902.343
Y2046-10	0.0264831	0.00110463	0.00102322	4.13067e-05	0.28277	1.15078e-05	5.48254	683.376	934.376
Y2046-14	0.0516074	0.000719985	0.00208918	2.50161e-05	0.282814	1.88046e-05	6.85203	639.357	847.247
Y2046-16	0.0292671	0.000391632	0.00110897	1.44751e-05	0.282689	1.39131e-05	2.5891	800.179	1118
Y2046-17	0.0369899	0.00108922	0.00137459	3.98278e-05	0.282783	1.57421e-05	5.86848	671.794	909.837
Y2046-20	0.0513433	0.000326241	0.00183895	5.28562e-06	0.282827	1.57622e-05	7.36064	615.96	814.852
Y2046-21	0.0208161	0.000358049	0.000742841	1.08749e-05	0.282698	1.30941e-05	2.98777	779.166	1092.73
Y2046-22	0.0442513	0.00124587	0.00150187	3.30407e-05	0.282844	2.03674e-05	8.01019	586.373	773.452
Y2047 (264.5 Ma)
Y2047-01	0.0187441	0.000218952	0.000702382	5.81833e-06	0.282803	1.57408e-05	6.78983	631.277	854.211
Y2047-02	0.0146558	0.000346514	0.000570437	1.46541e-05	0.282734	1.3517e-05	4.37603	725.372	1007.66
Y2047-03	0.0283833	0.000194114	0.00105879	8.62155e-06	0.282789	1.73355e-05	6.24244	656.69	889.049
Y2047-05	0.0563739	0.000578854	0.00223671	1.91298e-05	0.282859	1.67831e-05	8.50179	575.942	745.109
Y2047-08	0.0197066	5.65668e-05	0.00072807	1.50403e-06	0.282794	1.59665e-05	6.45311	644.896	875.644
Y2047-09	0.0561836	0.000786562	0.00210377	3.23471e-05	0.282783	1.55772e-05	5.84022	684.506	914.634
Y2047-10	0.060534	0.00132936	0.00215167	4.05976e-05	0.28278	1.51245e-05	5.7255	689.788	921.929
Y2047-13	0.0286118	0.000409143	0.00106893	1.72605e-05	0.282704	1.45789e-05	3.22165	777.654	1080.9
Y2047-14	0.0639457	0.00103727	0.00230779	2.96996e-05	0.282769	1.76869e-05	5.29215	709.559	949.476
Y2058 (253.6 Ma)
Y2058-001	0.0869638	0.00110833	0.00289235	3.79435e-05	0.282872	2.29778e-05	8.62588	566.932	728.544
Y2058-02	0.105134	0.000387265	0.00340137	7.64755e-06	0.282816	2.01407e-05	6.53658	660.812	861.709
Y2058-04	0.0871027	0.00146246	0.00278386	3.93029e-05	0.282847	1.70518e-05	7.74351	603.074	784.824
Y2058-05	0.0985026	0.00065053	0.00314561	2.05205e-05	0.282828	2.06534e-05	7.02068	637.33	830.883
Y2058-06	0.0918213	0.00593057	0.00278166	0.000139088	0.282892	2.52104e-05	9.35885	535.128	681.749
Y2058-08	0.0581841	0.00108377	0.00191238	4.08116e-05	0.282816	1.53533e-05	6.81171	632.96	844.192
Y2058-10	0.0972693	0.00368549	0.00305727	9.80491e-05	0.282867	1.87288e-05	8.41211	577.45	742.184
Y2058-11	0.0577383	0.00372493	0.00190531	0.000119108	0.282945	2.34501e-05	11.3638	445.964	553.533
Y2058-13	0.0363095	0.000761228	0.00119011	2.47873e-05	0.282862	1.79873e-05	8.55337	555.539	733.171
Y2059 (250.8 Ma)
Y2059-01	0.0566368	0.00127654	0.00184999	4.10738e-05	0.282918	2.58554e-05	10.3716	484.36	615.167
Y2059-03	0.104667	0.00179462	0.00329472	4.20931e-05	0.282927	2.40748e-05	10.4337	491.298	611.197
Y2059-04	0.0802504	0.00172005	0.00261862	6.07002e-05	0.282821	1.69903e-05	6.82791	637.714	841.312
Y2059-05	0.103503	0.00226004	0.00334877	5.46532e-05	0.282816	2.31308e-05	6.49783	659.826	862.327
Y2059-06	0.110422	0.00271069	0.00357299	6.28916e-05	0.282859	2.72186e-05	7.99545	598.117	766.909
Y2059-07	0.0785625	0.00253402	0.00254706	8.35207e-05	0.282831	1.75741e-05	7.17383	622.51	819.278
Y2059-12	0.0689522	0.00335933	0.00220069	9.83626e-05	0.282798	1.73952e-05	6.06391	664.826	889.943
Y2059-16	0.0502954	0.00186388	0.00146485	2.48545e-05	0.282864	1.81202e-05	8.53829	556.341	732.281
Y2059-18	0.0636735	0.00138328	0.00206795	3.76397e-05	0.282791	1.61579e-05	5.85738	671.817	903.081
Y2059-21	0.0914026	0.000400118	0.00290717	7.21443e-06	0.282785	1.64328e-05	5.48624	697.359	926.683
