# Supplementary material
Source: MDPI journal article supplement (https://www.mdpi.com/2075-163X/12/8/1040)
Supplement: s1 [file s1 › Supplementary Table S4.xlsx]

## Sheet: Table S4
Major (wt.%) and trace element (ppm) compositions for the samples
Samples	Y2001-Q1	Y2001-Q2	Y2002-Q1	Y2002-Q2	Y2046-Q1	Y2046-Q2	Y2047-Q1	Y2047-Q2	Y2047-Q3	Y2058-Q1	Y2058-Q2	Y2059-Q1	Y2059-Q2	Y2059-Q3
major element (wt.%)
SiO2	61.7994	59.2831	65.6666	67.2718	72.1047	72.0662	72.7822	72.3758	71.2726	74.8894	75.6282	76.947	75.8571	74.6447
Al2O3	16.6316	17.1092	17.7626	17.4583	14.98	15.0503	14.7056	14.8476	15.3635	13.343	12.9353	12.5004	12.68	12.78
Fe2O3T	6.83045	7.06	3.08889	2.34988	2.23124	2.2459	2.27495	2.2063	2.77386	1.39897	1.33905	1.2436	1.69123	2.32
CaO	7.19724	6.65	1.82251	0.843313	1.18857	1.11838	1.00803	1.28949	1.04786	0.042701	0.0488778	0.0604177	0.212354	0.266784
MgO	0.630503	0.684075	0.20653	0.205488	0.237713	0.216558	0.248695	0.253586	0.263496	0.0416843	0.0193475	0.0412854	0.0301925	0.0872375
K2O	1.53483	1.93524	4.95069	5.73433	4.33189	3.7852	3.56124	3.71755	3.51226	5.06108	4.96517	4.43466	4.44535	4.48462
Na2O	3.22325	4.14132	5.02826	5.067	4.10744	4.24271	4.08207	4.28941	4.19245	4.22638	4.23506	4.25643	4.05989	3.98
TiO2	0.419931	0.913556	0.178019	0.126243	0.174867	0.200291	0.211595	0.185416	0.197724	0.182496	0.172498	0.0936475	0.0982263	0.09799
P2O5	0.0625451	0.165632	0.0215598	0.0240075	0.0240774	0.0187074	0.0334312	0.0228946	0.0230814	0.00925188	0.00936824	0.0105731	0.00825262	0.0133899
MnO	0.160253	0.151687	0.174292	0.139671	0.129467	0.145796	0.142184	0.121968	0.183222	0.0550029	0.0871654	0.0519592	0.0582716	0.10925
LOI	1.31	1.71996	0.91	0.57	0.37	0.72	0.68	0.39	1.03	0.33	0.33	0.35	0.49	0.854
Tatal	99.8	99.8138	99.81	99.79	99.88	99.81	99.73	99.7	99.86	99.58	99.77	99.99	99.63	99.64
K2O+Na2O	4.75808	6.07656	9.97895	10.8013	8.43934	8.02791	7.64331	8.00696	7.70471	9.28746	9.20022	8.69109	8.50523	8.46462
Mg#	17.7038	18.4215	13.4815	16.9292	19.8903	18.3484	20.304	21.127	18.1254	6.49318	3.25757	7.18127	3.99431	8.05716
trace element (ppm）
Li	2.237	0.0966	3.862	2.392	14.29	13.77	17.1	16.25	20.17	2.148	2.115	1.918	1.695	3.868
Be	1.275	1.201	2.225	1.775	1.073	1.199	1.433	1.311	1.956	1.137	1.171	3.505	3.006	3.193
B	15	3.527	5.684	7.652	9.964	10.19	11.71	9.954	11.75	13.94	8.209	9.701	9.845	16.03
Sc	7.642	4.312	2.705	1.94	0.8851	0.9629	0.9151	0.7854	0.7301	1.137	1.126	0.5309	0.5887	0.54
V	114	67	13.91	10.66	9.908	13.05	10.77	11.59	11.52	3.307	2.76	3.042	2.342	2.898
Cr	24.26	60.35	9.099	50.61	38.28	12.82	20.53	45.79	38.86	14.27	30.12	9.58	24.87	41.91
Co	7.149	5.734	1.117	2.23	1.798	1.79	1.691	1.444	3.291	0.4241	0.5806	0.4871	0.6807	1.153
Ni	7.673	6.137	2.445	7.534	14.09	5.458	6.205	4.297	12.82	5.607	5.916	2.059	9.223	7.475
Cu	15.95	4.653	4.596	9.946	5.762	7.712	5.502	4.854	12.06	3.597	3.695	2.259	3.209	5.318
Zn	18.82	25.63	19.16	13.53	24.33	28.03	25.3	28.29	31.01	13.37	13.83	19.93	14.48	32.65
Ga	34.68	12.67	14.44	12.53	10.5	10.23	11.06	11.26	12.07	16.46	16.41	19.86	19.16	16.29
Ge	22.86	6.309	4.811	4.313	2.064	2.031	2.182	2.146	2.556	2.193	2.27	2.736	2.89	3.402
As	4.513	1.119	1.141	1.565	1.198	1.466	1.815	1.222	2.846	1.984	2.489	1.571	2.229	2.804
Se	1.546	1.251	0.7975	0.6377	0.5383	0.6139	0.5592	0.424	0.6004	0.9343	0.8228	1.178	1.724	1.42
Rb	8.099	3.34	74.37	68.56	80.74	74.96	80.78	73.33	78.06	130.4	142	202.4	230.2	220.1
Sr	378.9	392	240.1	220.7	342.3	364.7	332.3	369.7	342	15	9.782	20.01	25.89	19.45
Y	23.24	21.24	11.95	5.717	1.856	1.42	2.819	1.682	1.715	10.37	8.952	19.33	39.02	30.24
Zr	134	190.3	330.8	216	108.6	142.4	116.5	121.5	119	427.3	388.2	196.3	273.2	232.6
Nb	10.9	11.83	9.291	7.775	3.878	5.851	5.828	4.243	5.53	12.81	13.87	18.39	22.23	23.22
Mo	0.8447	1.342	0.486	0.9491	1.967	0.8707	0.831	0.9511	1.292	0.7764	1.077	0.6434	0.8398	1.168
Ag	0.1274	0.1818	0.2975	0.2256	0.1064	0.1231	0.1091	0.1156	0.1255	0.302	0.2959	0.1646	0.2279	0.1987
Cd	0.8018	1.325	2.182	1.393	0.7027	0.8206	0.6711	0.6405	0.705	2.238	2.265	1.2	1.765	1.49
Sn	3.891	1.788	1.037	1.119	1.455	1.553	2.846	1.46	4.251	1.946	2.14	2.823	2.582	3.337
Sb	6.423	2.544	2.501	2.598	4.968	7.204	4.93	4.308	5.559	6.752	4.791	4.915	4.587	4.771
Te	0.02568	0.01331	0.006894	0.02008	0.01403	0.02766	0.006926	0.01389	0.00688	0.02063	0.01992	0.006689	-	0.01988
Cs	0.2481	0.1059	1.794	0.7273	2.142	2.277	3.771	2.428	4.185	1.331	1.268	1.717	1.442	4.338
Ba	254	80.75	334	642.6	1054	1109	872.6	946.2	1255	75.24	79.3	107.1	84.04	68.37
La	5.372	14.25	21.18	11.77	6.769	4.84	9.282	6.728	5.305	4.21	3.501	10.22	25.33	31.18
Ce	17.18	34.16	37.77	30.09	11.05	11.73	20.43	11.4	8.886	10.44	8.81	26.76	48.11	64.25
Pr	2.747	4.843	3.81	2.207	1.379	1.017	2.035	1.364	1.179	1.038	1.141	2.432	5.816	7.291
Nd	11.59	19.91	13.04	7.353	4.587	3.41	6.848	4.662	4.084	3.622	4.126	8.323	20.12	25.71
Sm	3.152	4.419	2.596	1.258	0.7289	0.5414	1.099	0.709	0.6603	0.7989	0.8442	1.709	4.245	5.178
Eu	1.064	1.178	1.027	0.7402	0.3676	0.3686	0.3766	0.376	0.3402	0.0576	0.07709	0.09362	0.1151	0.1312
Gd	3.323	4.218	2.608	1.234	0.5324	0.4346	0.8258	0.5443	0.5258	1.126	0.9129	2.188	4.459	4.828
Tb	0.5773	0.6488	0.4028	0.1922	0.0716	0.05306	0.1196	0.07158	0.07407	0.3021	0.2368	0.4864	0.8898	0.7962
Dy	3.729	3.93	2.384	1.23	0.3276	0.2898	0.6207	0.3185	0.3828	2.291	1.881	3.53	6.337	5.16
Ho	0.8161	0.8411	0.5254	0.2755	0.06861	0.05981	0.1239	0.06767	0.08362	0.5418	0.468	0.8526	1.518	1.152
Er	2.523	2.447	1.585	0.8801	0.2313	0.2102	0.3762	0.2185	0.2675	1.705	1.561	2.761	4.831	3.542
Tm	0.4029	0.3751	0.2555	0.1432	0.03917	0.04049	0.06256	0.04317	0.04838	0.2643	0.2639	0.4507	0.7782	0.5556
Yb	2.748	2.487	1.749	1.036	0.3112	0.3087	0.414	0.3077	0.3391	1.861	1.845	3.025	5.215	3.489
Lu	0.4218	0.3816	0.2871	0.1709	0.05602	0.06525	0.07868	0.07327	0.07182	0.311	0.2968	0.4595	0.7756	0.5214
Hf	3.254	5.237	8.229	5.565	3.368	4.341	3.59	3.84	3.525	10.02	9.505	8.07	10.94	10.06
Ta	0.6993	0.843	0.6594	0.6695	0.4392	0.453	0.5975	0.4035	0.5394	0.9137	0.883	1.76	1.825	1.96
W	0.5433	0.681	0.4609	0.7144	0.5789	0.4716	0.6503	0.474	1.207	0.8201	1.032	0.7378	0.8234	0.9816
Tl	0.1623	0.03349	0.3423	0.2932	0.4534	0.4619	0.5165	0.4446	0.5984	0.6767	0.6195	0.8387	0.8825	0.8472
Pb	4.115	4.397	11	7.88	15.25	16	13.95	15.63	16	3.118	4.364	4.026	5.883	5.724
Bi	0.06842	0.1313	0.03514	0.0218	0.04677	0.03811	0.073	0.06413	0.07445	0.0781	0.125	0.08529	0.1373	0.1424
Th	2.485	6.124	10.91	7.039	3.234	3.549	7.675	3.398	3.828	3.599	5.027	8.559	16.75	17.92
U	0.8348	3.119	1.573	1.219	0.5743	0.7784	1.081	0.6515	0.8116	1.064	1.425	3.085	5.028	4.838
ΣREE	55.6461	94.0886	89.2198	58.5801	26.5194	23.3689	42.692	26.8837	22.2476	28.5687	25.9647	63.2908	128.54	153.784
(Eu/Eu*)	1.00522	0.834276	1.20682	1.81648	1.80427	2.32344	1.20871	1.85065	1.76536	0.185689	0.2685	0.148031	0.0808905	0.0802323
(La/Yb)N	1.31796	3.86299	8.16433	7.65952	14.6646	10.5704	15.1156	14.7415	10.5473	1.52518	1.27932	2.27777	3.27465	6.02504
T (Zr)	727.95	746.731	840.013	806.686	757.281	784.491	771.425	767.574	773.957	884.772	873.061	810.148	842.175	826.502
Mg # = 100 Mg2+ /(Mg2+ +Fe2+）; Eu/Eu* = Eu N/(Sm N*Gd N) 1/2
